# Supplementary material for: Bioengineered 3D microvessels and complementary animal models reveal mechanisms of Trypanosoma congolense sequestration
Source: Commun Biol. 2025 Feb 27;8:321. doi: 10.1038/s42003-025-07739-z (PMC11865532; doi:10.1038/s42003-025-07739-z)
Supplement: Supplementary file 3 — Supplementary Data 1 [file 42003_2025_7739_MOESM3_ESM.xlsx]

## Sheet: Sheet1
Rationale and experimental design:
We have produced transcriptomes from T. congolense (strain 1/148) parasites collected from the blood, brain, adipose tissue, and kidney of mice at day 6 post-infection, using spliced leader-based trypanosome mRNA enrichment. Here, we show the results of a differential expression anaysis comparing the transcriptomes of parasites collected from the blood (group = blood) with those of parasites coll…
ID	Gene Product (from TrytripDB, based on annotation, synteny, and orthology)	Function	logFC	AveExpr	t	P.Value	adj.P.Val	-LOG10 P	Annotation Possibility (Orthology-based)
TcIL3000.A.H_000125900:rRNA	rRNA	ribosome	2.48712	13.6083	-3.41303	0.000872138	0.0117048	1.93164
TcIL3000.A.H_000131600:rRNA	rRNA	ribosome	2.52083	13.5046	-3.44573	0.000798574	0.0109225	1.96168
TcIL3000.A.H_000021400:rRNA	rRNA	ribosome	2.52795	13.4924	-3.4508	0.000787738	0.010869	1.96381
TcIL3000.A.H_000134400:rRNA	rRNA	ribosome	2.53756	13.4618	-3.46003	0.00076833	0.0106611	1.9722
TcIL3000.A.H_000397800:rRNA	rRNA	ribosome	2.72549	13.0832	-3.79861	0.000303424	0.00517506	2.28608
TcIL3000.A.H_000181000:rRNA	rRNA	ribosome	2.57998	12.8622	-3.50215	0.000685507	0.00973182	2.01181
TcIL3000.A.H_000436400:rRNA	rRNA	ribosome	2.17229	12.5054	-2.72342	0.00516419	0.0486881	1.31258
TcIL3000.A.H_000711300:rRNA	rRNA	ribosome	2.36923	11.8792	-3.2032	0.00152378	0.0182556	1.7386
TcIL3000.A.H_000383900.1	EF-1 guanine nucleotide exchange domain containing protein, putative	Gene expression regulation	-2.20633	10.5685	3.46026	0.000767851	0.0106611	1.9722
TcIL3000.A.H_000126400:rRNA	rRNA	ribosome	2.18001	10.0503	-3.20025	0.00153563	0.0183528	1.7363
TcIL3000.A.H_000904400.1	ALBA-Domain Protein	RNA binding	-3.33335	9.74023	8.55881	4.02693e-10	2.47253e-07	6.60686
TcIL3000.A.H_000893700.1	dynein heavy chain, putative	flagellum / motility	2.37227	9.69923	-5.72338	1.16535e-06	6.89662e-05	4.16136
TcIL3000.A.H_000368900.1	Alba, putative	RNA binding	-2.14841	9.56258	5.28999	4.14145e-06	0.000199439	3.70019
TcIL3000.A.H_000953200.1	14-3-3 protein 1	signalling	-1.79023	9.42965	3.59437	0.000533171	0.00803355	2.09509
TcIL3000.A.H_000313200.1	dynein heavy chain, putative	flagellum / motility	2.32706	9.3603	-5.76014	1.04668e-06	6.49627e-05	4.18734
TcIL3000.A.H_000368800.1	ALBA-Domain Protein	RNA binding	-1.75634	9.20995	3.29789	0.00118649	0.0150986	1.82106
TcIL3000.A.H_000066300.1	VSG, putative	Surface	1.61218	9.00314	-2.87604	0.00353507	0.0354937	1.44985
TcIL3000.A.H_000891700.1	ribosome assembly protein RRB1, putative	ribosome	-1.87817	8.91292	3.80191	0.000300647	0.00514558	2.28857
TcIL3000.A.H_000522700.1	kinesin K39, putative	flagellum / motility	2.38048	8.8809	-4.31722	6.99919e-05	0.00165289	2.78176
TcIL3000.A.H_000479800.1	S-adenosylmethionine decarboxylase prozyme	SAMe metabolism	2.02565	8.68048	-4.79454	1.76066e-05	0.000561581	3.25059
TcIL3000.A.H_000404600.1	short-chain dehydrogenase, putative	compound metabolism	-3.00992	8.54214	7.00762	2.86356e-08	4.60902e-06	5.33639
TcIL3000.A.H_000086600.1	VSG, putative - Phy3	Surface	2.70412	8.48173	-9.69525	2.14203e-11	1.05217e-07	6.97792
TcIL3000.A.H_000370500.1	60S ribosomal protein L35a, putative	ribosome	1.69922	8.41652	-3.27425	0.00126329	0.0157726	1.8021
TcIL3000.A.H_000040900.1	Protein Associated with Differentiation, putative (PAD1-70%, Tb927.7.5930)	Cell division / differentiation	-2.31209	8.39512	4.71076	2.24633e-05	0.000676931	3.16946
TcIL3000.A.H_000866600.1	Family of unknown function (DUF5578), putative (HP)		-1.81057	8.38464	3.11723	0.0019077	0.0214431	1.66871
TcIL3000.A.H_000327400.1	hypothetical protein, conserved		-1.96635	8.34547	4.03011	0.000158516	0.00306548	2.5135
TcIL3000.A.H_000525600.1	Mitochondrial carrier protein, putative (HP)	trafficking	-1.93065	8.33279	3.68156	0.000419617	0.00669208	2.17444
TcIL3000.A.H_000530500.1	nucleoside hydrolase, putative	Nitrogen recycling	-1.73688	8.31495	3.24189	0.00137614	0.0167244	1.77665
TcIL3000.A.H_000640000.1	cysteine peptidase C (CPC)	gene expression regulation (post-transcriptional) and protein breakdown	1.71307	8.28086	-3.19458	0.00155868	0.018583	1.73088
TcIL3000.A.H_000486700.1	Adenylate cyclase, putative (HP)	signalling	1.6228	8.27043	-3.44606	0.000797863	0.0109225	1.96168
TcIL3000.A.H_000016500.1	D-tyrosyl-tRNA deacylase, putative		-2.07186	8.24348	4.3186	6.9714e-05	0.00165289	2.78176
TcIL3000.A.H_000402100.1	ubiquitin-conjugating enzyme E2, putative	protein degradation	-1.66932	8.2172	3.05315	0.00225194	0.0244724	1.61132
TcIL3000.A.H_000856800.1	glycosomal malate dehydrogenase	sugar metabolism	-2.27255	8.19836	4.99728	9.74827e-06	0.000370264	3.43149
TcIL3000.A.H_000427600.1	vesicle-associated membrane protein, putative	Vesicle & trafficking	-1.76071	8.187	3.67251	0.000430216	0.00677315	2.16921
TcIL3000.A.H_000040800.1	Protein Associated with Differentiation, putative (PAD1-68%-Tb927.7.5930)	Cell division / differentiation	-2.23483	8.1853	4.44215	4.88751e-05	0.00125039	2.90296
TcIL3000.A.H_000336800.1	trans-sialidase	Surface decoration - sialylation	1.5797	8.14295	-3.44643	0.00079708	0.0109225	1.96168
TcIL3000.A.H_000885500.1	dynein heavy chain, putative	flagellum / motility	2.41775	8.11238	-6.55414	1.04561e-07	1.25269e-05	4.90216
TcIL3000.A.H_000768400.1	universal minicircle sequence binding protein 1	kDNA replication	-2.17898	8.09603	4.59002	3.18837e-05	0.000922676	3.03495
TcIL3000.A.H_000042000.1	hypothetical protein, conserved		-2.19949	8.0647	4.9226	1.21226e-05	0.000427496	3.36907
TcIL3000.A.H_000352300.1	SPRY domain/HECT-domain (ubiquitin-transferase), putative	protein degradation	1.92423	7.9969	-4.26776	8.06435e-05	0.00185972	2.73055
TcIL3000.A.H_000866100.1	RNA recognition motif (a.k.a. RRM, RBD, or RNP domain)/RNA recognition motif. (a.k.a. RRM, RBD, or RNP domain), putative	RNA binding	-1.56782	7.96203	2.82674	0.00399952	0.0392913	1.4057
TcIL3000.A.H_000262500.1	RNA recognition motif (a.k.a. RRM, RBD, or RNP domain)/RNA recognition motif. (a.k.a. RRM, RBD, or RNP domain), putative	RNA binding	-1.64326	7.95624	2.89791	0.00334569	0.0341664	1.4664
TcIL3000.A.H_000927000.1	WD40 repeat protein	Protein-protein interaction	-1.62225	7.94706	3.02279	0.00243484	0.0259999	1.58503
TcIL3000.A.H_000593800.1	dynein heavy chain, putative	flagellum / motility	2.04184	7.94059	-4.95465	1.10403e-05	0.000395841	3.40248
TcIL3000.A.H_000209100.1	argonaute-like protein	RNAi machinery	2.65611	7.90998	-8.56718	3.93842e-10	2.47253e-07	6.60686
TcIL3000.A.H_000065500.1	Transferrin Receptor	Surface	2.27087	7.90562	-7.2578	1.41329e-08	3.15548e-06	5.50093
TcIL3000.A.H_000041000.1	Protein Associated with Differentiation, putative (PAD1-70%, Tb927.7.5930)	Cell division / differentiation	-2.12913	7.89768	4.18214	0.000102974	0.00227841	2.64237
TcIL3000.A.H_000118900.1	cysteine peptidase C (CPC)	gene expression regulation (post-transcriptional) and protein breakdown	1.66602	7.85353	-3.01188	0.00250393	0.0266796	1.57382
TcIL3000.A.H_000211600.1	Transferrin Receptor	Surface	2.31791	7.81404	-7.29863	1.26023e-08	2.94773e-06	5.53051
TcIL3000.A.H_000764800.1	N-acetyltransferase subunit Nat1, putative (HP)	Protein synthesis	-1.83544	7.79438	2.8515	0.00375955	0.0372801	1.42852
TcIL3000.A.H_000720800.1	intraflagellar transport protein 172	flagellum / trafficking	1.78599	7.76906	-4.57524	3.3278e-05	0.000950357	3.02211
TcIL3000.A.H_000070400.1	Transferrin Receptor	Surface	1.86558	7.76407	-4.96797	1.06194e-05	0.000386388	3.41298
TcIL3000.A.H_000465700.1	fatty acid desaturase, putative	Lipid metabolism	-1.84215	7.75391	3.78047	0.000319118	0.00536818	2.27017
TcIL3000.A.H_000794000.1	Concanavalin A-like lectin/glucanases superfamily/SPRY domain/HECT-domain (ubiquitin-transferase), putative	cell wall softening?	2.2276	7.73153	-5.78389	9.7653e-07	6.14964e-05	4.21115
TcIL3000.A.H_000357200.1	Histidine kinase-, DNA gyrase B-, and HSP90-like ATPase, putative	DNA repair	-1.86544	7.7309	3.49687	0.000695398	0.00984379	2.00684
TcIL3000.A.H_000576600.1	ubiquitin-protein ligase, putative	protein degradation	2.26607	7.70251	-5.7522	1.07125e-06	6.49627e-05	4.18734
TcIL3000.A.H_000518000.1	Flagellar attachment zone protein 10, putative (HP)	flagellum / motility	1.87764	7.70023	-3.73807	0.000358948	0.00591663	2.22793
TcIL3000.A.H_000940100.1	SNARE associated Golgi protein, putative	vesicle & trafficking	1.79487	7.68063	-3.74528	0.000351858	0.00582673	2.23457
TcIL3000.A.H_000966500.1	IQ calmodulin-binding motif containing protein, putative	signalling	-1.55065	7.67192	2.81921	0.00407531	0.0398764	1.39928
TcIL3000.A.H_000203300.1	nucleolar RNA-binding protein, truncated	RNA binding	-1.69192	7.60378	3.40772	0.000884672	0.0117489	1.93
TcIL3000.A.H_000203400.1	nucleolar RNA-binding protein, truncated	RNA binding	-1.69186	7.60375	3.40758	0.000884993	0.0117489	1.93
TcIL3000.A.H_000463600.1	U3 small nuclear ribonucleoprotein (snRNP), putative	RNP	-1.63441	7.59936	3.1103	0.00194236	0.0217828	1.66189
TcIL3000.A.H_000014400.1	Invariant surface glycoprotein, putative	Surface	2.17268	7.59909	-4.55277	3.55133e-05	0.000992892	3.0031
TcIL3000.A.H_000403500.1	Phage tail fibre repeat, putative		1.78136	7.58839	-2.7456	0.00489022	0.0463996	1.33349
TcIL3000.A.H_000354000.1	FHA domain containing protein, putative	regulation	-1.78357	7.57679	2.83726	0.00389586	0.0384266	1.41537
TcIL3000.A.H_000837600.1	Zinc-finger of C2H2 type, putative		-2.20875	7.55667	4.65518	2.63971e-05	0.000776424	3.1099
TcIL3000.A.H_000564900.1	nucleolar RNA-binding protein, truncated	RNA binding	-1.59198	7.55434	2.85774	0.00370125	0.0368027	1.43412
TcIL3000.A.H_000564800.1	nucleolar RNA-binding protein, truncated	RNA binding	-1.73033	7.5445	3.68427	0.000416499	0.00666399	2.17627
TcIL3000.A.H_000550800.1	trans-sialidase	Surface decoration - sialylation	-1.71489	7.53051	3.57639	0.000560041	0.0082859	2.08166
TcIL3000.A.H_000497800.1	asparagine synthetase a, putative	Protein synthesis	-1.96418	7.52598	4.69901	2.32431e-05	0.000687772	3.16256
TcIL3000.A.H_000203200.1	nucleolar RNA-binding protein, truncated	RNA binding	-1.71608	7.52405	3.66342	0.000441124	0.00687873	2.16249
TcIL3000.A.H_000769200.1	neurobeachin/beige protein, putative	membrane trafficking	1.73797	7.50716	-3.9638	0.000191108	0.00361996	2.4413
TcIL3000.A.H_000504000.1	zinc finger protein, putative		-1.66216	7.48129	2.94749	0.00295115	0.0308426	1.51085
TcIL3000.A.H_000743600.1	DnaJ domain/Transmembrane Fragile-X-F protein, putative	Gene expression and protein regulation	-1.84156	7.47507	3.06303	0.00219524	0.0240692	1.61854
TcIL3000.A.H_000892700.1	LisH, putative	gene regulation	1.80608	7.47327	-4.06419	0.00014395	0.00290981	2.53614
TcIL3000.A.H_000841500.1	Domain of unknown function (DUF4475), putative		-1.92006	7.46702	3.78452	0.00031555	0.00532639	2.27357
TcIL3000.A.H_000028100.1	Transferrin Receptor	Surface	2.34866	7.43893	-7.18626	1.7284e-08	3.39597e-06	5.46904
TcIL3000.A.H_000973100.1	Nucleoporin	nuclear membrane trafficking	2.08335	7.43726	-5.14962	6.24511e-06	0.000269087	3.57011
TcIL3000.A.H_000630800.1	serine/threonine-protein kinase a, putative	signalling	-1.66203	7.41338	3.27582	0.00125803	0.0157639	1.80234
TcIL3000.A.H_000640500.1	Papain family cysteine protease, putative	Protein breakdown	1.60877	7.41328	-2.8656	0.00362893	0.0361921	1.44139
TcIL3000.A.H_000632000.1	nucleoporin (NUP54/57), putative	nuclear membrane trafficking	-1.64041	7.41207	2.85098	0.00376444	0.0372801	1.42852
TcIL3000.A.H_000663600.1	PTP1-interacting protein, 39 kDa	trypanosome differentiation inhibition	-1.72498	7.40782	3.18419	0.00160173	0.0189133	1.72323
TcIL3000.A.H_000650300.1	hypothetical protein, conserved - pseudogene		1.5528	7.40294	-2.98387	0.00268995	0.0283542	1.54738	Adenylate cyclase
TcIL3000.A.H_000548800.1	hypothetical protein, conserved		2.34396	7.39748	-7.09705	2.22317e-08	3.90008e-06	5.40893
TcIL3000.A.H_000746700.1	NADH-dependent fumarate reductase	glycolysis	2.29003	7.39259	-7.0021	2.90879e-08	4.60902e-06	5.33639
TcIL3000.A.H_000346000.1	serine peptidase, clan SB, family S8-like protein	protein degradation	2.03222	7.35963	-5.66316	1.38962e-06	7.84577e-05	4.10536
TcIL3000.A.H_000970200.1	VHS domain containing protein, putative		-2.4707	7.35946	6.40812	1.59244e-07	1.62959e-05	4.78792
TcIL3000.A.H_000012300.1	hypothetical protein, conserved		1.84971	7.35303	-3.81741	0.000287952	0.00496287	2.30427
TcIL3000.A.H_000629700.1	peptidase, putative	Protein breakdown	1.97268	7.35204	-4.07257	0.000140576	0.00288916	2.53923
TcIL3000.A.H_001033900.1	glucosamine-6-phosphate isomerase, putative	deamination	-1.94325	7.34131	4.38441	5.7712e-05	0.00143899	2.84194
TcIL3000.A.H_000565300.1	Domain of unknown function (DUF3437), putative		2.72195	7.31936	-7.59665	5.48853e-09	1.58586e-06	5.79973
TcIL3000.A.H_000350200.1	VIT family, putative	Extracellular matrix stabilisation	-1.67203	7.3077	3.28779	0.00121874	0.015429	1.81166
TcIL3000.A.H_000398400.1	Adenylate and Guanylate cyclase catalytic domain containing protein, putative	signalling	2.02251	7.29909	-4.55366	3.54216e-05	0.000992892	3.0031
TcIL3000.A.H_000315700.1	hypothetical protein, conserved		1.84256	7.29247	-4.13242	0.000118622	0.00252238	2.59819
TcIL3000.A.H_000998400.1	Fusaric acid resistance protein-like, putative		1.79842	7.2645	-3.69644	0.000402745	0.00648617	2.18801
TcIL3000.A.H_000365100.1	hypothetical protein, conserved		-2.72266	7.26296	6.43704	1.46496e-07	1.56433e-05	4.80567
TcIL3000.A.H_000969200.1	Basal body protein, putative (HP)	flagellum / motility	2.04384	7.26145	-4.01058	0.000167505	0.00321399	2.49295
TcIL3000.A.H_000907600.1	Ring finger domain containing protein, putative		1.57785	7.25191	-3.09025	0.00204603	0.0226354	1.64521
TcIL3000.A.H_000307400.1	dynein heavy chain, putative	flagellum / motility	2.5227	7.24825	-6.25381	2.48806e-07	2.22207e-05	4.65324
TcIL3000.A.H_000904900.1	Sister chromatid cohesion C-terminus, putative		2.05409	7.24605	-5.06083	8.09629e-06	0.00032465	3.48858
TcIL3000.A.H_000496200.1	protein kinase C substrate protein, heavy chain, putative	signalling	1.75935	7.24231	-3.52314	0.000647525	0.0093274	2.03024
TcIL3000.A.H_000295600.1	fatty acid desaturase, putative	Lipid metabolism	-2.34614	7.23032	6.14783	3.38336e-07	2.76985e-05	4.55754
TcIL3000.A.H_000357400.1	hypothetical protein, conserved		-1.74035	7.22786	3.57711	0.000558944	0.0082859	2.08166
TcIL3000.A.H_000859100.1	Diacylglycerol kinase catalytic domain containing protein, putative	signalling	-1.98558	7.20177	4.17746	0.000104357	0.00229866	2.63853
TcIL3000.A.H_000515900.1	hypothetical protein, conserved		-1.6694	7.18225	3.00355	0.00255799	0.0270891	1.56721
TcIL3000.A.H_000073400.1	2-oxoglutarate (2OG) and Fe(II)-dependent oxygenase superfamily protein, putative		2.00766	7.18207	-3.47043	0.000747025	0.010484	1.97947
TcIL3000.A.H_000923400.1	hypothetical protein, conserved - pseudogene		1.63106	7.18108	-3.25343	0.00133484	0.0163103	1.78754	Adenylate cyclase
TcIL3000.A.H_000357500.1	dynein heavy chain, putative	flagellum / motility	2.00135	7.17873	-4.05867	0.000146218	0.00293192	2.53285
TcIL3000.A.H_000225600.1	cysteine peptidase, Clan CA, family C1, Cathepsin L-like		1.88187	7.17506	-3.83646	0.000273055	0.00473939	2.32428
TcIL3000.A.H_000701600.1	Double RNA binding domain protein 9	RNA binding	-2.64071	7.17497	6.90263	3.85839e-08	5.57423e-06	5.25381
TcIL3000.A.H_000833000.1	bifunctional aminoacyl-tRNA synthetase, putative	Protein synthesis	1.71192	7.17269	-3.83779	0.000272045	0.00473859	2.32435
TcIL3000.A.H_000900300.1	hypothetical protein, conserved, pseudogene		-2.3944	7.16752	5.24226	4.76239e-06	0.000222789	3.65211	Adenylate cyclase
TcIL3000.A.H_000313100.1	hypothetical protein, conserved - pseudogene		1.68043	7.15482	-3.18326	0.00160562	0.0189133	1.72323	Adenylate cyclase
TcIL3000.A.H_001003800.1	hypothetical protein, conserved		1.75252	7.15171	-3.58713	0.000543834	0.00814425	2.08915	Protein binding MF
TcIL3000.A.H_000682400.1	protein kinase, putative	signalling	-1.90472	7.14894	4.12331	0.000121735	0.00255539	2.59254
TcIL3000.A.H_001016100.1	hypothetical protein, conserved		1.95891	7.14824	-4.73288	2.10651e-05	0.000638714	3.19469
TcIL3000.A.H_000216200.1	Protein Associated with Differentiation, putative (PAD1- 69%, Tb927.7.5930)	Cell division / differentiation	-2.13573	7.09816	4.30537	7.24102e-05	0.00170181	2.76909
TcIL3000.A.H_000688100.1	PRP8 protein homologue	transcription	1.6609	7.0954	-3.39605	0.000912855	0.0119572	1.92237
TcIL3000.A.H_000522600.1	'Cold-shock' DNA-binding domain containing protein, putative	DNA binding	1.78925	7.08711	-3.04543	0.00229716	0.0247992	1.60556
TcIL3000.A.H_000702100.1	Nop53 (60S ribosomal biogenesis), putative	ribosome	-2.1075	7.06831	4.34168	6.52485e-05	0.00159453	2.79737
TcIL3000.A.H_000546300.1	Zinc finger, C3HC4 type (RING finger), putative		2.04106	7.0545	-4.76825	1.90063e-05	0.000587164	3.23124
TcIL3000.A.H_000470100.1	endosomal trafficking protein RME-8, putative	vesicle & trafficking	2.60579	7.05006	-6.35269	1.86895e-07	1.80006e-05	4.74471
TcIL3000.A.H_000455800.1	essential nuclear protein 1, putative	nuclear export	-2.34837	7.04131	5.89652	7.02992e-07	4.933e-05	4.30689
TcIL3000.A.H_000314100.1	RNA-binding protein	RNA binding	-1.76576	7.03907	3.85075	0.000262379	0.00460464	2.3368
TcIL3000.A.H_000877300.1	C2H2-type zinc finger containing protein, putative		-2.17227	7.03107	5.514	2.14977e-06	0.00011604	3.93539
TcIL3000.A.H_000898900.1	hypothetical protein		1.74574	7.02682	-3.27849	0.00124918	0.015693	1.80429
TcIL3000.A.H_000557000.1	Domain of unknown function (DUF4456), putative		2.20369	7.02651	-5.59393	1.70146e-06	9.39051e-05	4.02731
TcIL3000.A.H_000921000.1	protein transport protein SEC31, putative	vesicle & trafficking	1.81356	7.00694	-3.93724	0.00020593	0.00383528	2.4162
TcIL3000.A.H_000648900.1	microtubule-associated protein	flagellum / motility	2.40267	6.98238	-4.5798	3.28413e-05	0.00094337	3.02532
TcIL3000.A.H_000895500.1	leucine-rich repeat protein (LRRP), putative		2.00117	6.94682	-4.89222	1.32459e-05	0.000449022	3.34773
TcIL3000.A.H_000483400.1	MIZ/SP-RING zinc finger, putative	DNA binding	-1.74108	6.93861	3.34198	0.00105504	0.0136377	1.86526
TcIL3000.A.H_000571100.1	Dynein heavy chain, N-terminal region 2, putative	Protein synthesis	2.68611	6.93756	-5.80872	9.08251e-07	5.94844e-05	4.2256
TcIL3000.A.H_000549800.1	hypothetical protein, conserved		1.99706	6.93742	-4.16811	0.000107172	0.00231521	2.63541
TcIL3000.A.H_000487100.1	hypothetical protein, conserved		1.93399	6.93532	-5.12294	6.75207e-06	0.000283471	3.54749
TcIL3000.A.H_000615900.1	SH3-binding, glutamic acid-rich protein, putative	redox activity regulation	-2.82655	6.93453	8.19694	1.06137e-09	5.21345e-07	6.28287
TcIL3000.A.H_000484000.1	S-adenosylmethionine synthetase, putative	SAMe metabolism	-1.61217	6.92722	3.23978	0.00138382	0.0167244	1.77665
TcIL3000.A.H_000484100.1	S-adenosylmethionine synthetase, putative	SAMe metabolism	-1.61217	6.92722	3.23978	0.00138382	0.0167244	1.77665
TcIL3000.A.H_000814700.1	argonaute-like protein	RNAi machinery	2.61201	6.92257	-7.5748	5.83154e-09	1.59136e-06	5.79823
TcIL3000.A.H_000979700.1	2-oxoglutarate dehydrogenase E2 component, putative		-1.68511	6.91287	2.79121	0.00436904	0.0421626	1.37507
TcIL3000.A.H_000272700.1	hypothetical protein, conserved		2.54245	6.90961	-5.86548	7.69607e-07	5.25043e-05	4.27981	Flagellar attachment zone protein 10
TcIL3000.A.H_000447600.1	pumilio RNA binding protein, putative	post-transcriptional regulation	1.93625	6.90238	-3.62135	0.000495181	0.00757734	2.12048
TcIL3000.A.H_000489400.1	thimet oligopeptidase, putative		-1.99748	6.88795	4.31772	6.98915e-05	0.00165289	2.78176
TcIL3000.A.H_000778900.1	VSG, putative - Phy1	Surface	1.64961	6.88732	-2.72445	0.00515111	0.0486582	1.31284
TcIL3000.A.H_000569600.1	vacuolar-type Ca2+-ATPase, putative	Vacuole-related	1.74592	6.88567	-4.10549	0.00012805	0.00266518	2.57427
TcIL3000.A.H_000859900.1	WD domain, G-beta repeat, putative	Protein-protein interaction	-2.3834	6.88105	5.1547	6.15308e-06	0.000267468	3.57273
TcIL3000.A.H_000470600.1	zinc-finger protein, conserved		-2.19879	6.87958	4.89199	1.32549e-05	0.000449022	3.34773
TcIL3000.A.H_000547500.1	Zinc finger, C3HC4 type (RING finger), putative		2.12431	6.86735	-5.4316	2.73609e-06	0.000137139	3.86284
TcIL3000.A.H_001000200.1	hypothetical protein, conserved		-3.85455	6.86724	9.2978	5.8628e-11	1.36311e-07	6.86547
TcIL3000.A.H_000388500.1	amino acid transporter AATP5	Surface	-2.10691	6.86326	4.50823	4.03921e-05	0.00107829	2.96726
TcIL3000.A.H_000710600.1	ankyrin-repeat protein, putative - pseudogene	Protein-protein interaction	1.59967	6.86066	-2.95348	0.00290657	0.0305066	1.51561
TcIL3000.A.H_000894700.1	phospholipid-transporting ATPase 1-like protein, putative	phospholipid metabolism	2.06319	6.85776	-4.58949	3.1933e-05	0.000922676	3.03495
TcIL3000.A.H_000209000.1	argonaute-like protein	RNAi machinery	2.65894	6.84925	-7.49932	7.19254e-09	1.85946e-06	5.73061
TcIL3000.A.H_000980600.1	hypothetical protein, conserved		-2.19825	6.8433	5.52441	2.08527e-06	0.00011381	3.94382
TcIL3000.A.H_000718900.1	Flagellum attachment zone protein 6, putative (HP)	flagellum / motility	1.80908	6.82769	-2.92309	0.00313948	0.0324736	1.48847
TcIL3000.A.H_000117600.1	thimet oligopeptidase, putative	Protein breakdown (metallopeptidase)	-2.00903	6.82438	4.88929	1.33596e-05	0.000449467	3.3473
TcIL3000.A.H_000931900.1	neurobeachin/beige protein, putative	membrane trafficking	2.66924	6.81773	-6.13759	3.4855e-07	2.77039e-05	4.55746
TcIL3000.A.H_000644100.1	Zn-finger in Ran binding protein and others/SPRY domain/HECT-domain (ubiquitin-transferase), putative		2.23543	6.81384	-4.78994	1.78439e-05	0.00056548	3.24758
TcIL3000.A.H_000449300.1	hypothetical protein, conserved		1.78899	6.81279	-3.77083	0.000327781	0.00547639	2.26151
TcIL3000.A.H_000435600.1	Adenylate / Guanylate cyclase, putative (HP)	signalling	1.61527	6.81249	-3.12752	0.0018573	0.0211182	1.67534
TcIL3000.A.H_000518400.1	Intraflagellar transport protein 74,, putative (HP)	flagellum / trafficking	1.64505	6.80909	-3.14101	0.00179313	0.0205791	1.68657
TcIL3000.A.H_000879600.1	translation initiation factor eIF2B delta subunit, putative	protein synthesis	1.57323	6.8087	-3.05818	0.00222288	0.0242489	1.61531
TcIL3000.A.H_000216300.1	Protein Associated with Differentiation, putative (PAD1-71%, Tb927.7.5930)	Cell division / differentiation	-2.09414	6.80689	4.20533	9.63864e-05	0.00215205	2.66715
TcIL3000.A.H_000320000.1	Mitochondrial ATP synthase subunit, putative (HP)	energy production	-1.82038	6.806	3.66644	0.00043747	0.00684348	2.16472
TcIL3000.A.H_000478500.1	Protein of unknown function (DUF2817), putative		2.244	6.80309	-6.03392	4.71124e-07	3.56025e-05	4.44852
TcIL3000.A.H_000616000.1	transaldolase, putative	nucleotide synthesis	-1.97263	6.80291	4.05513	0.000147693	0.00294062	2.53156
TcIL3000.A.H_000286700.1	COG4 transport protein, putative	Protein synthesis	1.97648	6.79571	-4.90059	1.29267e-05	0.000447153	3.34954
TcIL3000.A.H_000305700.1	protein phosphatase 2C, putative	regulation	-1.81617	6.79461	3.43837	0.000814589	0.0110532	1.95651
TcIL3000.A.H_000662900.1	solanesyl-diphosphate synthase, putative	reoxidation in mitochondria	-2.15713	6.79297	4.39632	5.57688e-05	0.00139763	2.85461
TcIL3000.A.H_000856500.1	U3 snoRNA-associated protein UTP11, putative	RNA-related	-1.65505	6.78883	2.79719	0.00430466	0.041623	1.38067
TcIL3000.A.H_000564400.1	RNA-binding protein, putative	RNA binding	1.96501	6.78861	-4.06754	0.000142594	0.00290632	2.53666
TcIL3000.A.H_000786200.1	hypothetical protein, conserved		1.81339	6.78344	-3.85865	0.000256653	0.00456768	2.3403
TcIL3000.A.H_000209700.1	Invariant surface glycoprotein, putative	Surface	1.82071	6.7781	-3.56534	0.000577199	0.00851412	2.06986
TcIL3000.A.H_000705000.1	hypothetical protein, conserved - pseudogene		-1.55815	6.76534	2.81469	0.00412145	0.0402476	1.39526	Adenylate cyclase
TcIL3000.A.H_000503600.1	HIRA-interacting protein 5, putative	iron/sulphur homeostasis	-2.11321	6.76168	4.3785	5.87e-05	0.00144892	2.83896
TcIL3000.A.H_000970300.1	RWD domain/Uncharacterized protein family UPF0029, putative		-1.67061	6.7577	3.02757	0.00240515	0.0257949	1.58847
TcIL3000.A.H_000173400.1	amino acid transporter AATP5	Surface	-1.81668	6.75578	3.05143	0.00226194	0.0245268	1.61036
TcIL3000.A.H_000267000.1	Fam72, hypothetical protein, conserved	Surface	1.80302	6.75005	-4.04783	0.000150773	0.00297429	2.52662
TcIL3000.A.H_000255800.1	hypothetical protein, conserved		-2.21033	6.74426	5.20145	5.36644e-06	0.000244074	3.61248	haptoglobin-hemoglobin receptor
TcIL3000.A.H_000750900.1	zinc finger protein		1.74898	6.74129	-3.12071	0.00189052	0.0213191	1.67123
TcIL3000.A.H_000483500.1	S-adenosylmethionine synthetase, putative	SAMe metabolism	-1.59396	6.73318	3.13152	0.00183804	0.0209964	1.67786
TcIL3000.A.H_000886600.1	recombinase rad51, putative	DNA recombination and repair	-1.83792	6.73292	3.72617	0.000370974	0.00603385	2.21941
TcIL3000.A.H_000020100.1	hypothetical protein, conserved - pseudogene		2.00896	6.73098	-4.87862	1.37816e-05	0.000457399	3.33971	Adenylate cyclase
TcIL3000.A.H_000483900.1	S-adenosylmethionine synthetase, putative	SAMe metabolism	-1.61474	6.72838	3.25381	0.00133348	0.0163103	1.78754
TcIL3000.A.H_000483600.1	S-adenosylmethionine synthetase, putative	SAMe metabolism	-1.59927	6.72462	3.17359	0.00164682	0.0192142	1.71638
TcIL3000.A.H_000483700.1	S-adenosylmethionine synthetase, putative	SAMe metabolism	-1.59927	6.72462	3.17359	0.00164682	0.0192142	1.71638
TcIL3000.A.H_000483800.1	S-adenosylmethionine synthetase, putative	SAMe metabolism	-1.59927	6.72462	3.17359	0.00164682	0.0192142	1.71638
TcIL3000.A.H_000484200.1	S-adenosylmethionine synthetase, putative	SAMe metabolism	-1.59927	6.72462	3.17359	0.00164682	0.0192142	1.71638
TcIL3000.A.H_000453200.1	Mitochondrial carrier protein, putative (HP)	trafficking	-1.918	6.72101	3.75512	0.000342387	0.00570104	2.24405
TcIL3000.A.H_000450100.1	Polyadenylation mediator complex protein PAMC2, putative (HP)	RNA synthesis	2.21288	6.71821	-5.45783	2.53388e-06	0.000132408	3.87808
TcIL3000.A.H_000624800.1	TFIIH basal transcription factor subunit	pol II transcription initiation and DNA repair	2.29411	6.71814	-5.39239	3.06891e-06	0.000150745	3.82176
TcIL3000.A.H_000087600.1	Transferrin Receptor	Surface	1.94406	6.71808	-4.90391	1.28018e-05	0.000445976	3.35069
TcIL3000.A.H_000016200.1	hypothetical protein, conserved - pseudogene		1.72492	6.71723	-3.37427	0.000967744	0.0126424	1.89817	Adenylate cyclase
TcIL3000.A.H_000554700.1	COG4 transport protein, putative	Protein synthesis	2.4412	6.71637	-6.68709	7.1393e-08	9.47791e-06	5.02329
TcIL3000.A.H_000216100.1	Protein Associated with Differentiation, putative (PAD1-69%-Tb927.7.5930)	Cell division / differentiation	-2.01861	6.71575	3.87964	0.000242022	0.00438452	2.35808
TcIL3000.A.H_000581400.1	Concanavalin A-like lectin/glucanases superfamily/Beige/BEACH domain containing protein, putative	cell wall softening?	2.55111	6.71415	-6.58431	9.58737e-08	1.17733e-05	4.9291
TcIL3000.A.H_000248400.1	bilobe protein, conserved		1.66855	6.70619	-3.07856	0.00210893	0.0231746	1.63499
TcIL3000.A.H_000426100.1	ABC1 family, putative	Surface	3.29782	6.68905	-9.16127	8.32516e-11	1.36311e-07	6.86547
TcIL3000.A.H_000671500.1	fructose-1,6-bisphosphatase	gluconeogenesis	-2.47621	6.68749	6.1709	3.16417e-07	2.63431e-05	4.57933
TcIL3000.A.H_000466900.1	chaperone protein DNAj, putative	Gene expression and protein regulation	-1.76924	6.684	3.67686	0.00042509	0.00671396	2.17302
TcIL3000.A.H_000185100.1	VSG, putative - Phy2	Surface	1.74249	6.68137	-3.53928	0.000619706	0.00900591	2.04547
TcIL3000.A.H_000826000.1	RNA-binding protein, putative	RNA binding	-2.05722	6.6784	5.03675	8.68676e-06	0.000335979	3.47369
TcIL3000.A.H_000826100.1	RNA-binding protein, putative	RNA binding	-2.05559	6.66637	5.04741	8.42027e-06	0.00033287	3.47773
TcIL3000.A.H_000794300.1	target of rapamycin (TOR) kinase 1	TOR signaling (protein synthesis and degradation regulation)	2.65226	6.65888	-7.42456	8.85912e-09	2.1758e-06	5.66238
TcIL3000.A.H_000498800.1	regulator of chromosome condensation, putative	cell division / differentiation	-1.98938	6.64871	3.94054	0.000204027	0.00382512	2.41735
TcIL3000.A.H_000709100.1	hypothetical protein, conserved		2.21745	6.6485	-6.47913	1.29756e-07	1.44855e-05	4.83907
TcIL3000.A.H_000653100.1	low molecular weight protein tyrosine phosphatase, putative	cell growth regulation	1.85473	6.64201	-4.04268	0.000152987	0.00299391	2.52376
TcIL3000.A.H_000703500.1	hypothetical protein, conserved		-1.88109	6.63758	2.91187	0.00322981	0.0331207	1.4799
TcIL3000.A.H_000018100.1	ABC transporter, putative - pseudogene		-1.73176	6.63407	3.05922	0.00221693	0.0242489	1.61531
TcIL3000.A.H_000020200.1	Centrosomal protein POC5, putative (HP)	mitosis	1.75677	6.631	-3.39903	0.000905565	0.0118934	1.92469
TcIL3000.A.H_000020300.1	hypothetical protein, conserved - pseudogene		2.91459	6.61113	-7.00654	2.87239e-08	4.60902e-06	5.33639	Adenylate cyclase
TcIL3000.A.H_000407900.1	zinc finger CCCH domain containing protein 12		2.48458	6.60816	-6.11362	3.7368e-07	2.91351e-05	4.53558
TcIL3000.A.H_000741000.1	bilobe protein, conserved		1.76538	6.60529	-3.54571	0.000608942	0.00887574	2.0518
TcIL3000.A.H_000671700.1	hypothetical protein, conserved		2.01714	6.60338	-3.96287	0.00019161	0.00361996	2.4413
TcIL3000.A.H_000903900.1	ATP-dependent RNA helicase, putative	RNA metabolism	2.35396	6.60066	-6.17828	3.09713e-07	2.62295e-05	4.58121
TcIL3000.A.H_000041100.1	Protein Associated with Differentiation, putative (PAD1- 69%, Tb927.7.5930)	Cell division / differentiation	-2.58334	6.59913	5.43869	2.6799e-06	0.000135708	3.86739
TcIL3000.A.H_000284100.1	phosphatidylinositol 3-kinase, putative	phospholipid metabolism	1.73927	6.59727	-3.16536	0.00168266	0.0195395	1.70909
TcIL3000.A.H_000159600.1	SPRY domain/HECT-domain (ubiquitin-transferase), putative	protein degradation	2.83439	6.58157	-8.15092	1.20199e-09	5.36744e-07	6.27023
TcIL3000.A.H_000589000.1	Putative serine esterase (DUF676), putative		2.77915	6.58115	-7.90676	2.33606e-09	7.64981e-07	6.11635
TcIL3000.A.H_000456700.1	hypothetical protein, conserved		-1.82607	6.5759	3.56062	0.000584683	0.00859869	2.06557
TcIL3000.A.H_000456800.1	spliceosome-associated protein, putative	transcription	2.31649	6.5519	-5.68234	1.31384e-06	7.68284e-05	4.11448
TcIL3000.A.H_001026400.1	hypothetical protein, conserved		1.67331	6.54997	-2.8956	0.00336526	0.0342239	1.46567	Adenylate cyclase
TcIL3000.A.H_000735100.1	VSG, putative - Phy1	Surface	1.80649	6.54597	-3.85261	0.000261021	0.00460464	2.3368
TcIL3000.A.H_000960200.1	telomerase reverse transcriptase	cell aging reversion	1.70951	6.54013	-3.29626	0.00119163	0.0151248	1.82031
TcIL3000.A.H_000601100.1	Fam73, hypothetical protein, conserved	Surface	-1.99839	6.52331	4.07002	0.000141595	0.00289798	2.5379
TcIL3000.A.H_000689800.1	Enriched in surface-labeled proteome protein 9	Surface	1.60401	6.51868	-3.04922	0.00227485	0.0246125	1.60885
TcIL3000.A.H_000666700.1	Nucleotidyltransferase domain containing protein, putative	nucleotide synthesis	1.64145	6.49288	-3.09541	0.00201884	0.0223849	1.65004
TcIL3000.A.H_000998300.1	TPR repeat, putative		1.69151	6.49245	-3.33654	0.00107045	0.0138007	1.8601
TcIL3000.A.H_000657700.1	hypothetical protein, conserved		-2.04654	6.48899	4.78441	1.81333e-05	0.000570766	3.24354
TcIL3000.A.H_000821900.1	hypothetical protein, conserved		-2.1577	6.48738	5.50473	2.20889e-06	0.000117935	3.92836
TcIL3000.A.H_000629900.1	hypothetical protein, conserved		1.72215	6.46937	-3.5489	0.000603664	0.00882499	2.05429
TcIL3000.A.H_000687400.1	Bem46-like serine peptidase	signalling, essential in Tb	-1.75559	6.46711	2.91269	0.00322316	0.0331207	1.4799
TcIL3000.A.H_000586800.1	Galactose oxidase, central domain containing protein, putative	Sugar metabolism	2.161	6.4605	-5.04189	8.55726e-06	0.000333597	3.47678
TcIL3000.A.H_000862700.1	hypothetical protein, conserved, pseudogene		-2.57865	6.45646	5.75262	1.06994e-06	6.49627e-05	4.18734	Adenylate cyclase
TcIL3000.A.H_000819200.1	Tetratricopeptide repeats, putative (HP)		1.73927	6.45338	-3.53813	0.000621647	0.00900746	2.0454
TcIL3000.A.H_000859200.1	hypothetical protein, conserved		1.99206	6.44844	-3.93689	0.000206131	0.00383528	2.4162
TcIL3000.A.H_000458900.1	Armadillo/beta-catenin-like repeats, putative (HP)		1.79687	6.43952	-3.44484	0.000800506	0.0109225	1.96168
TcIL3000.A.H_000448200.1	cysteine peptidase, Clan CA, family C1, Cathepsin L-like		1.93045	6.43947	-4.41991	5.21083e-05	0.0013262	2.87739
TcIL3000.A.H_000629600.1	chaperone protein DNAj, putative	Gene expression and protein regulation	2.49515	6.43248	-6.36449	1.80627e-07	1.77448e-05	4.75093
TcIL3000.A.H_000945100.1	glutathionylspermidine synthetase, putative	glutathione metabolism	1.63026	6.4281	-2.7704	0.00460006	0.0440458	1.3561
TcIL3000.A.H_000679700.1	mitochondrial exoribonuclease DSS-1	RNA processing and degradation	1.79149	6.42353	-3.35029	0.00103188	0.0133737	1.87375
TcIL3000.A.H_000589100.1	SET domain containing protein, putative	SAMe metabolism	1.59472	6.41995	-2.96231	0.00284201	0.0298928	1.52443
TcIL3000.A.H_000703600.1	hypothetical protein, conserved, pseudogene		-1.92439	6.4117	4.10185	0.00012938	0.0026815	2.57162	Adenylate cyclase
TcIL3000.A.H_000577000.1	MSP-B, putative - pseudogene	Surface	-1.62674	6.41103	3.09556	0.0020181	0.0223849	1.65004
TcIL3000.A.H_000675300.1	PSP1 C-terminal conserved region, putative	RNA-binding protein	-2.27873	6.40857	4.4783	4.40365e-05	0.00114448	2.94139
TcIL3000.A.H_000632800.1	KH domain/Domain of unknown function (DUF1771)/Smr domain containing protein, putative	RNA binding	-2.05254	6.40726	4.81984	1.63561e-05	0.000525106	3.27975
TcIL3000.A.H_000501100.1	ATPase subunit 9, putative	Energy production	-2.24072	6.40411	4.96238	1.0794e-05	0.000389854	3.4091
TcIL3000.A.H_000822800.1	succinate dehydrogenase cytochrome B subunit, putative (HP)	mitochondrial electron transport chain	-2.04284	6.40301	4.82931	1.59112e-05	0.000517587	3.28602
TcIL3000.A.H_000457600.1	Mitochondrial SSU ribosomal protein, putative (HP)	ribosomal	1.69007	6.399	-3.1484	0.00175894	0.0202339	1.69392
TcIL3000.A.H_000821700.1	hypothetical protein, conserved		-1.85673	6.39415	3.28619	0.00122393	0.0154548	1.81094
TcIL3000.A.H_000286600.1	hypothetical protein, conserved		2.36963	6.3902	-5.81296	8.97065e-07	5.94844e-05	4.2256
TcIL3000.A.H_000523700.1	hypothetical protein, conserved - pseudogene		1.90435	6.37879	-3.85061	0.00026248	0.00460464	2.3368	Adenylate cyclase
TcIL3000.A.H_001026900.1	zinc finger protein, putative		-1.8874	6.37854	3.64033	0.000470038	0.00722503	2.14116
TcIL3000.A.H_000327900.1	hypothetical protein, conserved, pseudogene		1.62772	6.3756	-2.71648	0.00525277	0.0494283	1.30602	Adenylate cyclase
TcIL3000.A.H_000999300.1	hypothetical protein, conserved		1.92291	6.37356	-3.65306	0.000453878	0.00705522	2.15149
TcIL3000.A.H_000594000.1	hypothetical protein, conserved		-2.19889	6.37286	3.88284	0.000239862	0.00436371	2.36014
TcIL3000.A.H_000628700.1	hypothetical protein, conserved		1.82732	6.36724	-3.67933	0.000422201	0.00671149	2.17318
TcIL3000.A.H_000551300.1	ATPase, putative	Energy production	-1.68087	6.36301	3.03907	0.00233505	0.025153	1.59941
TcIL3000.A.H_000633600.1	hypothetical protein, conserved		1.60347	6.35707	-2.77906	0.00450255	0.0432809	1.3637
TcIL3000.A.H_000641000.1	HECT-domain (ubiquitin-transferase), putative (HP)	protein degradation	-1.72707	6.35268	3.40067	0.0009016	0.0118731	1.92544
TcIL3000.A.H_000634500.1	lipase, putative	lipid metabolism	2.32588	6.35105	-5.14365	6.35508e-06	0.000269105	3.57008
TcIL3000.A.H_000607700.1	DIGIT	cell differentiation?	2.2153	6.3506	-6.26275	2.42443e-07	2.20533e-05	4.65653
TcIL3000.A.H_000957100.1	signal recognition particle receptor alpha subunit, putative	protein synthesis (targetting of nascent proteins to ER)	1.77149	6.34857	-3.42208	0.000851142	0.0115174	1.93865
TcIL3000.A.H_000727700.1	hypothetical protein, conserved		2.75146	6.3313	-6.28487	2.27402e-07	2.10754e-05	4.67622
TcIL3000.A.H_000647000.1	hypothetical protein, conserved		-1.97895	6.33091	3.36607	0.000989251	0.0128891	1.88978
TcIL3000.A.H_000337200.1	peptidase M20/M25/M40, putative - pseudogene	Protein breakdown	1.56561	6.33045	-2.79956	0.00427943	0.041469	1.38228
TcIL3000.A.H_000549500.1	hypothetical protein, conserved		2.47912	6.32657	-6.41896	1.54339e-07	1.613e-05	4.79237
TcIL3000.A.H_000619700.1	multi-pass transmembrane protein, putative (HP)		-2.28765	6.32255	4.52765	3.81887e-05	0.00103068	2.98688
TcIL3000.A.H_000463700.1	L-threonine 3-dehydrogenase, putative	Protein synthesis	-2.05548	6.31892	4.56937	3.38478e-05	0.000961042	3.01726
TcIL3000.A.H_000340400.1	tryparedoxin 2, putative		2.49708	6.31078	-4.82541	1.6093e-05	0.000520058	3.28395
TcIL3000.A.H_000798100.1	ras-like small GTPase, putative	signalling	-1.84166	6.31037	3.57661	0.000559712	0.0082859	2.08166
TcIL3000.A.H_001032800.1	Dopey, N-terminal, putative	cell morphology and spatiotemporal organisation	2.01671	6.30887	-4.54734	3.60748e-05	0.00100113	2.99951
TcIL3000.A.H_000629200.1	NADH-ubiquinone oxidoreductase complex I subunit, putative (HP)	mitochondrial electron transport chain	2.10125	6.3061	-4.92086	1.21843e-05	0.000427496	3.36907
TcIL3000.A.H_000008400.1	hypothetical protein, conserved		1.67872	6.3044	-3.32842	0.00109391	0.0140661	1.85183
TcIL3000.A.H_000610900.1	leucine-rich repeat protein (LRRP), putative		-1.63437	6.30113	2.8375	0.00389354	0.0384266	1.41537
TcIL3000.A.H_001000900.1	hypothetical protein, conserved		1.77584	6.29814	-3.27369	0.00126515	0.0157726	1.8021
TcIL3000.A.H_000972700.1	exosome-associated protein 4	vesicle & trafficking	2.06934	6.29683	-4.28521	7.67133e-05	0.00178586	2.74815
TcIL3000.A.H_000091700.1	Papain family cysteine protease, putative	Protein breakdown	1.84546	6.29605	-3.74481	0.000352309	0.00582673	2.23457
TcIL3000.A.H_000326100.1	Peroxisome biogenesis protein 2, putative	peroxisome assembly and matrix protein import.	1.84646	6.29363	-3.26092	0.00130865	0.016151	1.7918
TcIL3000.A.H_000834100.1	cAMP phosphodiesterase A, putative	signalling	-2.68168	6.28707	5.66743	1.37239e-06	7.8386e-05	4.10576
TcIL3000.A.H_000408900.1	hypothetical protein, conserved		1.70035	6.28312	-3.12953	0.00184762	0.0210569	1.67661
TcIL3000.A.H_000746600.1	nuclear transmembrane protein, putative		2.00452	6.28189	-4.24646	8.57071e-05	0.00195811	2.70816
TcIL3000.A.H_000665600.1	hypothetical protein, conserved		1.91592	6.28142	-4.52814	3.81341e-05	0.00103068	2.98688
TcIL3000.A.H_000028200.1	procyclin-associated gene 2-like protein, putative	Surface	2.2661	6.27776	-4.78015	1.83593e-05	0.000570766	3.24354
TcIL3000.A.H_000628300.1	IQ calmodulin-binding motif containing protein, putative	signalling	2.21513	6.26774	-6.19143	2.98119e-07	2.56905e-05	4.59023
TcIL3000.A.H_000596400.1	hypothetical protein, conserved		1.60659	6.25925	-2.76543	0.00465691	0.0445034	1.35161
TcIL3000.A.H_000042400.1	hypothetical protein, conserved		1.86781	6.25536	-3.12525	0.0018683	0.0211513	1.67466	binding
TcIL3000.A.H_000741600.1	hypothetical protein, conserved		1.74798	6.25441	-3.35844	0.00100963	0.0131199	1.88207
TcIL3000.A.H_000166800.1	hypothetical protein, conserved, pseudogene		1.59464	6.24097	-2.8878	0.00343201	0.0345452	1.46161	Adenylate cyclase
TcIL3000.A.H_000026400.1	procyclin-associated gene 2-like protein, putative	Surface	2.11901	6.23896	-4.06493	0.000143651	0.00290981	2.53614
TcIL3000.A.H_000162100.1	2-oxoglutarate (2OG) and Fe(II)-dependent oxygenase superfamily protein		1.92256	6.23231	-3.26908	0.00128071	0.0159262	1.79789
TcIL3000.A.H_000024200.1	VSG, putative - Phy15	Surface	1.8185	6.22438	-3.63983	0.000470686	0.00722503	2.14116
TcIL3000.A.H_001017100.1	serine/threonine-protein kinase, putative	signalling	-1.97805	6.22422	4.40967	5.36674e-05	0.00135187	2.86907
TcIL3000.A.H_000639900.1	C2H2-type zinc finger/C2H2 type zinc-finger (2 copies)/Zinc finger, C2H2 type, putative		2.37632	6.2138	-4.96941	1.05747e-05	0.000386388	3.41298
TcIL3000.A.H_000576800.1	MSP-B, putative	Surface	-1.64401	6.21103	3.0051	0.00254782	0.0270885	1.56722
TcIL3000.A.H_000845800.1	hypothetical protein, conserved		1.8307	6.21074	-3.25599	0.00132585	0.0162814	1.78831
TcIL3000.A.H_000119500.1	C2H2-type zinc finger/C2H2 type zinc-finger (2 copies)/Zinc finger, C2H2 type, putative		2.37187	6.20736	-4.98027	1.02448e-05	0.000379989	3.42023
TcIL3000.A.H_000918600.1	WASH complex subunit 7, N-terminal/WASH complex subunit 7/WASH complex subunit 7, C-terminal, putative	endosome / actin nucleation	2.25744	6.2056	-5.91656	6.63104e-07	4.72053e-05	4.32601
TcIL3000.A.H_000698400.1	dolichol kinase, putative	Protein glycosylation	1.63265	6.2012	-2.89682	0.00335488	0.0341891	1.46611
TcIL3000.A.H_000699100.1	protein kinase, putative	signalling	2.0635	6.19817	-4.1698	0.000106657	0.00231521	2.63541
TcIL3000.A.H_000349700.1	hypothetical protein, conserved		-1.92349	6.19748	3.67049	0.000432616	0.00678916	2.16818
TcIL3000.A.H_000441800.1	cysteine peptidase C (CPC)	gene expression regulation (post-transcriptional) and protein breakdown	1.55676	6.19725	-2.88948	0.00341749	0.0345065	1.4621
TcIL3000.A.H_000289200.1	calpain-like protein, putative	ntegrin-mediated cell migration, cytoskeletal remodeling, cell differentiation and apoptosis	-2.20334	6.19657	5.7385	1.115e-06	6.6791e-05	4.17528
TcIL3000.A.H_000824700.1	hypothetical protein, conserved		-2.43498	6.1799	5.93296	6.32144e-07	4.56631e-05	4.34043
TcIL3000.A.H_000497100.1	heat shock 70 kDa protein, putative	Gene expression regulation	3.28712	6.16576	-8.67668	2.94737e-10	2.47253e-07	6.60686
TcIL3000.A.H_000819400.1	WD domain, G-beta repeat, putative	Protein-protein interaction	2.44366	6.16255	-6.3337	1.97444e-07	1.86509e-05	4.7293
TcIL3000.A.H_000589900.1	conserved protein		1.75469	6.16159	-3.41854	0.0008593	0.0115958	1.9357
TcIL3000.A.H_000985800.1	cdc2-related kinase 12	gene expression, transcript elongation	1.57671	6.15861	-2.79948	0.00428029	0.041469	1.38228
TcIL3000.A.H_000837100.1	ethanolamine phosphotransferase (EPT)	lipid metabolism	-1.93477	6.15483	3.58016	0.000554299	0.00827573	2.08219
TcIL3000.A.H_000438400.1	hypothetical protein, conserved		1.76937	6.14865	-3.59442	0.000533101	0.00803355	2.09509
TcIL3000.A.H_000723300.1	Aminoacyl-tRNA editing domain containing protein, putative	Protein synthesis	2.25926	6.14454	-5.23048	4.92941e-06	0.000226292	3.64533
TcIL3000.A.H_000686400.1	hypothetical protein, conserved		2.07485	6.14347	-4.50429	4.08542e-05	0.00108473	2.96468
TcIL3000.A.H_000660300.1	mismatch repair protein MSH3, putative	DNA repair	2.05333	6.13712	-4.32313	6.88144e-05	0.00164886	2.78282
TcIL3000.A.H_000795300.1	Vps54-like protein, putative	Vacuole-related	1.91612	6.13202	-4.41651	5.2621e-05	0.00133234	2.87538
TcIL3000.A.H_001018400.1	1-acyl-sn-glycerol-3-phosphate acyltransferase, putative	Lipid metabolism	-1.97374	6.12343	4.09058	0.000133583	0.00275698	2.55957
TcIL3000.A.H_000942400.1	DIS3-like exonuclease, putative	RNA processing and degradation	2.30311	6.12091	-5.1095	7.02254e-06	0.000289871	3.53779
TcIL3000.A.H_000801400.1	emp24/gp25L/p24 family/GOLD, putative	vesicle & trafficking	-1.78145	6.10841	3.00341	0.00255891	0.0270891	1.56721
TcIL3000.A.H_000498600.1	regulator of chromosome condensation, putative	cell division / differentiation	2.48836	6.10263	-5.82985	8.53932e-07	5.74591e-05	4.24064
TcIL3000.A.H_000166100.1	hypothetical protein, conserved - pseudogene		1.70337	6.09858	-3.46046	0.000767437	0.0106611	1.9722	Adenylate cyclase
TcIL3000.A.H_000289700.1	calpain-like cysteine peptidase, Clan CA, family C2	ntegrin-mediated cell migration, cytoskeletal remodeling, cell differentiation and apoptosis	-2.09476	6.09674	3.40779	0.000884495	0.0117489	1.93
TcIL3000.A.H_000781500.1	hypothetical protein, conserved		1.62768	6.09496	-2.75595	0.00476718	0.0454687	1.34229
TcIL3000.A.H_000635100.1	hypothetical protein, conserved		-2.54687	6.09315	5.15568	6.13543e-06	0.000267468	3.57273
TcIL3000.A.H_000529300.1	von Willebrand factor type A domain containing protein, putative	Cell adhesion	1.7808	6.09055	-3.12034	0.00189233	0.0213191	1.67123
TcIL3000.A.H_000759700.1	XPC-binding domain containing protein, putative	DNA repair	1.84731	6.08979	-3.77315	0.000325677	0.00545982	2.26282
TcIL3000.A.H_000409800.1	hypothetical protein, conserved, pseudogene		1.69817	6.08916	-3.41673	0.000863482	0.0116203	1.93478	purine metabolism, protein binding
TcIL3000.A.H_000936400.1	mitochondrial RNA binding protein 16	RNA binding	-1.64582	6.08403	2.88906	0.00342114	0.0345065	1.4621
TcIL3000.A.H_000408500.1	hypothetical protein, conserved		1.92938	6.08057	-4.0369	0.000155507	0.00301917	2.52011
TcIL3000.A.H_000042300.1	40S ribosomal protein S13, putative	ribosome	1.76015	6.07343	-3.31264	0.00114084	0.0146314	1.83471
TcIL3000.A.H_000719900.1	Golgin subfamily A member 5, putative (HP)	vesicle & trafficking	1.84624	6.06977	-3.23454	0.0014031	0.0168922	1.77231
TcIL3000.A.H_000626800.1	Fam72, hypothetical protein, conserved	Surface	2.01523	6.06545	-5.05944	8.12947e-06	0.00032465	3.48858
TcIL3000.A.H_000955800.1	Protein of unknown function (DUF498/DUF598), putative		1.63824	6.06431	-2.80684	0.00420267	0.0409593	1.38765
TcIL3000.A.H_000628200.1	High-temperature-induced dauer-formation protein, putative		2.08089	6.06429	-4.53432	3.74595e-05	0.00102223	2.99045
TcIL3000.A.H_000563300.1	Bucentaur or craniofacial development, putative		1.87544	6.05928	-4.22027	9.23646e-05	0.00208117	2.68169
TcIL3000.A.H_000312900.1	PUB domain containing protein, putative	Protein breakdown (metallopeptidase)	1.75552	6.05156	-3.13596	0.00181693	0.0208036	1.68186
TcIL3000.A.H_000631400.1	UDP-Gal or UDP-GlcNAc-dependent glycosyltransferase, putative	Surface decoration	-1.76216	6.05027	3.08833	0.00205625	0.0226974	1.64402
TcIL3000.A.H_000552700.1	hypothetical protein, conserved		-2.18137	6.04785	5.19732	5.43179e-06	0.000244779	3.61123
TcIL3000.A.H_000787200.1	Protein of unknown function (DUF2962), putative		1.93055	6.04682	-3.60364	0.000519807	0.00788053	2.10344
TcIL3000.A.H_000398600.1	trans-sialidase	Surface decoration - sialylation	-2.0282	6.04628	4.05862	0.000146238	0.00293192	2.53285
TcIL3000.A.H_000511200.1	YbaB/EbfC DNA-binding family, putative (HP)	DNA binding	1.85843	6.04489	-3.48501	0.000718118	0.0101071	1.99537
TcIL3000.A.H_000864800.1	B9 domain-containing protein 2	signalling & organelle biogenesis	-1.84415	6.03971	3.58841	0.000541937	0.00814066	2.08934
TcIL3000.A.H_000495700.1	dynein heavy chain, putative	flagellum / motility	2.93852	6.03197	-6.9027	3.85767e-08	5.57423e-06	5.25381
TcIL3000.A.H_000490500.1	UDP-Gal or UDP-GlcNAc-dependent glycosyltransferase, putative	Surface decoration	2.78291	6.02255	-6.62825	8.45109e-08	1.0644e-05	4.97289
TcIL3000.A.H_000905000.1	hypothetical protein, conserved - pseudogene		2.24015	6.01951	-5.42705	2.7728e-06	0.000137576	3.86146	Adenylate cyclase
TcIL3000.A.H_000464500.1	kinesin, putative	flagellum / motility	2.03578	6.01775	-3.87851	0.000242791	0.00438452	2.35808
TcIL3000.A.H_000010600.1	VSG, putative - Phy9	Surface	2.0472	6.01512	-3.64476	0.000464353	0.00719527	2.14295
TcIL3000.A.H_000720700.1	hypothetical protein, conserved		3.48699	6.01363	-8.23371	9.61101e-10	5.21345e-07	6.28287
TcIL3000.A.H_000707100.1	hypothetical protein, conserved - pseudogene		1.74129	6.01031	-2.91949	0.00316824	0.0326256	1.48644	Adenylate cyclase
TcIL3000.A.H_000765400.1	amino acid tansporter, putative	Surface	-1.87814	6.00627	3.51823	0.000656214	0.00942492	2.02572
TcIL3000.A.H_000153200.1	hypothetical protein, conserved		1.88589	6.00566	-4.24946	8.49753e-05	0.00195046	2.70986
TcIL3000.A.H_000677600.1	membrane- trafficking protein, putative	trafficking	1.77463	6.00452	-3.18363	0.00160409	0.0189133	1.72323
TcIL3000.A.H_000738300.1	Trafficking protein Mon1, putative	vesicle & trafficking	2.17589	6.0002	-4.35374	6.30286e-05	0.00154798	2.81023
TcIL3000.A.H_000704400.1	proteasome complex subunit Rpn13 ubiquitin receptor, putative	protein degradation	2.1387	5.99738	-3.70991	0.00038803	0.00626975	2.20275
TcIL3000.A.H_000630900.1	squalene synthase, putative	steroid metabolism	-1.92565	5.99136	4.22113	9.21366e-05	0.00208117	2.68169
TcIL3000.A.H_000708100.1	cysteine peptidase, Clan CA, family C19, putative		2.03492	5.99021	-4.17349	0.000105542	0.00231439	2.63556
TcIL3000.A.H_000745000.1	hypothetical protein, conserved - pseudogene		1.72148	5.98905	-2.89008	0.00341234	0.0345065	1.4621	Adenylate cyclase
TcIL3000.A.H_000710500.1	NADH-ubiquinone oxidoreductase complex I subunit, putative	mitochondrial electron transport chain	1.88931	5.98679	-2.77954	0.00449722	0.0432809	1.3637
TcIL3000.A.H_000528400.1	hypothetical protein, conserved, pseudogene		-1.95589	5.98258	3.81105	0.000293101	0.00503395	2.29809	Adenylate cyclase
TcIL3000.A.H_000294000.1	protein kinase, putative (HP)	signalling	2.58571	5.97951	-7.14327	1.95111e-08	3.54957e-06	5.44982
TcIL3000.A.H_000824900.1	glutamine aminotransferase (GlnAT)	Protein synthesis	-1.99501	5.97919	4.18316	0.000102674	0.00227841	2.64237
TcIL3000.A.H_000653200.1	zinc finger protein family member, putative		3.08143	5.97359	-7.69314	4.20247e-09	1.29016e-06	5.88936
TcIL3000.A.H_000276200.1	hypothetical protein, conserved - pseudogene		1.8246	5.97318	-3.79279	0.000308374	0.00522322	2.28206	Adenylate cyclase
TcIL3000.A.H_000635600.1	hypothetical protein, conserved in T. brucei and T. congolense		-2.1507	5.97303	3.531	0.000633822	0.00915687	2.03825
TcIL3000.A.H_000922000.1	inositol-1,4,5-trisphosphate (IP3) 5-phosphatase, putative	signalling	1.82222	5.9647	-3.79651	0.000305203	0.00518739	2.28505
TcIL3000.A.H_000410600.1	hypothetical protein, conserved		1.89444	5.96326	-3.55619	0.000591791	0.00867724	2.06162	calpain-like cysteine peptidase
TcIL3000.A.H_000713900.1	Protein of unknown function, DUF607, putative		2.16412	5.96127	-5.44756	2.61122e-06	0.000135014	3.86962
TcIL3000.A.H_000577700.1	Enriched in surface-labeled proteome protein 10	Surface	2.67511	5.95913	-6.90984	3.78006e-08	5.57423e-06	5.25381
TcIL3000.A.H_000681000.1	hypothetical protein, conserved - pseudogene		2.96535	5.95742	-6.08677	4.04003e-07	3.10073e-05	4.50854	Adenylate cyclase
TcIL3000.A.H_000792200.1	bromodomain protein	gene expression regulation	1.98305	5.95686	-3.50608	0.000678232	0.00967692	2.01426
TcIL3000.A.H_000018600.1	zinc finger protein - pseudogene		1.98454	5.95237	-3.73254	0.00036449	0.00598787	2.22273
TcIL3000.A.H_000955100.1	hypothetical protein, conserved		1.87118	5.94236	-3.90399	0.000226069	0.00414347	2.38264
TcIL3000.A.H_000656500.1	GTPase activating protein, putative	regulation	-1.72526	5.93433	3.23925	0.00138576	0.0167244	1.77665
TcIL3000.A.H_000067100.1	Transferrin Receptor	Surface	2.32754	5.93424	-5.97046	5.66712e-07	4.15476e-05	4.38145
TcIL3000.A.H_000713000.1	GPI transamidase component GAA1	endocytosis	1.71895	5.93186	-3.02908	0.00239585	0.0257515	1.5892
TcIL3000.A.H_001020400.1	synaptobrevin, putative	Vesicle & trafficking	2.25783	5.93034	-4.8971	1.30586e-05	0.000448558	3.34818
TcIL3000.A.H_000348200.1	hypothetical protein, conserved - pseudogene		2.22043	5.92906	-4.99549	9.79934e-06	0.000370264	3.43149	Adenylate cyclase
TcIL3000.A.H_000547800.1	Enriched in surface-labeled proteome protein 17	Surface	1.87981	5.92268	-3.85156	0.000261787	0.00460464	2.3368
TcIL3000.A.H_000827600.1	hypothetical protein, conserved, pseudogene		1.62665	5.92044	-2.82169	0.00405021	0.0397098	1.4011	adenylate cyclase, pseudouridine synthesis
TcIL3000.A.H_000606900.1	hypothetical protein, conserved - pseudogene		1.73651	5.91975	-2.80365	0.00423617	0.0412041	1.38506	Adenylate cyclase
TcIL3000.A.H_000732900.1	hypothetical protein, conserved		-1.77803	5.91711	3.30997	0.00114897	0.0146591	1.83389
TcIL3000.A.H_000020800.1	folylpolyglutamate synthase, putative	folate metabolism	1.67987	5.9032	-3.18812	0.0015853	0.0188547	1.72458
TcIL3000.A.H_000294700.1	hypothetical protein, conserved - pseudogene		2.27004	5.8941	-4.5084	4.0372e-05	0.00107829	2.96726	Purine metabolism, protein binding
TcIL3000.A.H_000956000.1	hypothetical protein, conserved - pseudogene		2.52028	5.89187	-5.79845	9.35881e-07	6.04875e-05	4.21833	Adenylate cyclase
TcIL3000.A.H_000956100.1	conserved protein		2.35379	5.8915	-6.13647	3.49683e-07	2.77039e-05	4.55746
TcIL3000.A.H_000309900.1	40S ribosomal protein S13, putative	ribosome	1.82747	5.88756	-3.51471	0.000662528	0.00948786	2.02283
TcIL3000.A.H_000063100.1	AAA domain containing protein, putative	ATPase activity	2.81428	5.8848	-6.85366	4.43579e-08	6.22532e-06	5.20584
TcIL3000.A.H_000613700.1	hypothetical protein, conserved - pseudogene		2.10362	5.8663	-4.50081	4.12664e-05	0.00108618	2.9641	Adenylate cyclase
TcIL3000.A.H_000856400.1	DNA-directed RNA polymerases I and III subunit RPAC1, putative	transcription	-1.67447	5.8645	3.1003	0.00199344	0.0222036	1.65358
TcIL3000.A.H_000899100.1	serine peptidase, clan SB, family S8-like protein	protein degradation	2.22066	5.86288	-4.23625	8.82443e-05	0.00200674	2.69751
TcIL3000.A.H_000556300.1	cysteine peptidase C (CPC)	gene expression regulation (post-transcriptional) and protein breakdown	2.01899	5.85759	-4.21606	9.34794e-05	0.00209667	2.67847
TcIL3000.A.H_000813500.1	hypothetical protein, conserved, pseudogene		-2.52909	5.85047	5.11553	6.89983e-06	0.00028722	3.54179	Adenylate cyclase
TcIL3000.A.H_000323500.1	hypothetical protein, conserved, pseudogene		1.77296	5.85013	-3.26745	0.00128623	0.0159544	1.79712	Adenylate cyclase
TcIL3000.A.H_000679600.1	ADP-ribosylation factor-like protein, putative	vesicle & trafficking	2.1396	5.84918	-4.02793	0.000159496	0.00307232	2.51253
TcIL3000.A.H_000676800.1	Archaic translocase outer mitochondrial membrane 40	mitochondrial	-1.73953	5.84718	2.92049	0.00316022	0.0326114	1.48663
TcIL3000.A.H_000289300.1	calpain-like protein, putative	ntegrin-mediated cell migration, cytoskeletal remodeling, cell differentiation and apoptosis	-2.1604	5.84614	4.76011	1.94619e-05	0.000597479	3.22368
TcIL3000.A.H_000463900.1	ABC transporter, putative	Surface	-1.78704	5.84589	3.20934	0.00149938	0.0180072	1.74455
TcIL3000.A.H_000536300.1	hypothetical protein, conserved - pseudogene		2.04686	5.84183	-4.16738	0.000107394	0.00231521	2.63541	Adenylate cyclase
TcIL3000.A.H_000553900.1	Domain of unknown function (DUF4139), putative		-2.22267	5.83729	5.14568	6.31759e-06	0.000269105	3.57008
TcIL3000.A.H_000508000.1	EF-hand domain pair, putative	Gene expression regulation	1.86935	5.82364	-3.88992	0.000235153	0.00429394	2.36714
TcIL3000.A.H_000275800.1	wd40 repeat domain-containing protein	Protein-protein interaction	1.80213	5.82337	-2.92299	0.00314026	0.0324736	1.48847
TcIL3000.A.H_000957300.1	phytoene synthase, putative	biosynthesis of carotenoids	2.03405	5.8167	-4.32862	6.77406e-05	0.00163109	2.78752
TcIL3000.A.H_000412800.1	Putative methyltransferase, putative	SAMe metabolism	2.23681	5.81571	-4.86807	1.4212e-05	0.000468518	3.32927
TcIL3000.A.H_000652200.1	hypothetical protein, conserved		1.74441	5.81112	-2.95103	0.00292473	0.0306317	1.51383
TcIL3000.A.H_000443700.1	ATP-dependent DEAH-box RNA helicase, putative		1.89154	5.80818	-4.0547	0.000147869	0.00294062	2.53156
TcIL3000.A.H_000904800.1	Sister chromatid cohesion C-terminus		2.86274	5.8072	-8.67497	2.9607e-10	2.47253e-07	6.60686
TcIL3000.A.H_001002800.1	SET domain containing protein, putative	SAMe metabolism	1.75048	5.79643	-3.18525	0.00159726	0.0189133	1.72323
TcIL3000.A.H_000384800.1	Iron/manganese superoxide dismutases, C-terminal domain containing protein, putative	cellular defense	1.89901	5.79368	-3.1558	0.00172527	0.0198932	1.7013
TcIL3000.A.H_000687700.1	mitochondrial carrier protein	trafficking	1.72229	5.79113	-3.10812	0.00195339	0.0218566	1.66042
TcIL3000.A.H_000985900.1	hypothetical protein, conserved, pseudogene		-1.73329	5.78095	3.16159	0.00169935	0.0196868	1.70583	Adenylate cyclase
TcIL3000.A.H_000489700.1	CDP-DAG synthase	lipid storage	2.24747	5.78026	-4.33136	6.72097e-05	0.00162628	2.78881
TcIL3000.A.H_000412700.1	hypothetical protein, conserved		1.88211	5.7646	-3.93241	0.000208738	0.00386914	2.41239
TcIL3000.A.H_000791100.1	TFIIF-stimulated CTD phosphatase, putative	pol II transcription initiation	-2.20078	5.76379	4.7051	2.28361e-05	0.000680613	3.1671
TcIL3000.A.H_000047300.1	PLAC8 family, putative		-2.43946	5.76215	4.84696	1.5114e-05	0.000494932	3.30545
TcIL3000.A.H_000452200.1	hypothetical protein, conserved, pseudogene		-1.85041	5.75735	2.87541	0.0035407	0.0354937	1.44985	Adenylate cyclase
TcIL3000.A.H_000980400.1	membrane-bound acid phosphatase, putative	Surface	-1.98542	5.75623	3.72476	0.000372424	0.00603745	2.21915
TcIL3000.A.H_000551200.1	Legume-like lectin family, putative (HP)	carbohydrate-binding	-2.28977	5.75517	3.60448	0.000518614	0.00788053	2.10344
TcIL3000.A.H_000092300.1	procyclin-associated gene 2-like protein, putative	Surface	2.02224	5.75471	-3.45491	0.000779042	0.0107793	1.96741
TcIL3000.A.H_000063000.1	AAA domain containing protein, putative	ATPase activity	2.39952	5.74346	-5.79219	9.53156e-07	6.08039e-05	4.21607
TcIL3000.A.H_001032300.1	Protein of unknown function (DUF2638), putative		-1.89897	5.73849	3.1681	0.00167065	0.019446	1.71117
TcIL3000.A.H_000415100.1	amidase, putative (HP)	amide metabolism	2.19031	5.73828	-4.04625	0.000151447	0.00297563	2.52642
TcIL3000.A.H_000609200.1	hypothetical protein, conserved		2.30573	5.73284	-4.9987	9.70798e-06	0.000370264	3.43149
TcIL3000.A.H_000045400.1	hypothetical protein, conserved		2.03213	5.72537	-3.40195	0.00089849	0.0118731	1.92544	membrane-associated protein
TcIL3000.A.H_000868300.1	DNA repair protein, putative	DNA repair	1.79864	5.71954	-3.07909	0.00210599	0.0231746	1.63499
TcIL3000.A.H_000921900.1	Starter unit:ACP transacylase in aflatoxin biosynthesis, putative (HP)		1.70951	5.71136	-2.86522	0.00363247	0.0361921	1.44139
TcIL3000.A.H_000445600.1	pumilio RNA binding protein, putative	post-transcriptional regulation	3.33932	5.70879	-8.64472	3.20706e-10	2.47253e-07	6.60686
TcIL3000.A.H_000036600.1	hypothetical protein, conserved - pseudogene		2.27038	5.70746	-4.98489	1.01075e-05	0.000378993	3.42137	Adenylate cyclase
TcIL3000.A.H_000903000.1	hypothetical protein, conserved		2.04361	5.70438	-3.86848	0.000249693	0.00447626	2.34909	protein binding MF
TcIL3000.A.H_000957800.1	hypothetical protein, conserved - pseudogene		2.04276	5.69878	-4.2793	7.80234e-05	0.00180779	2.74285	Adenylate cyclase
TcIL3000.A.H_000589800.1	hypothetical protein, conserved		2.0853	5.69809	-4.29286	7.50512e-05	0.00175548	2.7556
TcIL3000.A.H_000532200.1	pumilio/PUF RNA binding protein 5	post-transcriptional regulation	-1.90257	5.69708	3.40074	0.00090143	0.0118731	1.92544
TcIL3000.A.H_000347300.1	Vesicle coat protein involved in Golgi to plasma membrane transport, putative	Vesicle & trafficking	1.87472	5.69114	-3.46373	0.000760695	0.0106454	1.97284
TcIL3000.A.H_000190800.1	cysteine peptidase, Clan CA, family C1, Cathepsin L-like		2.12804	5.68822	-4.78137	1.82943e-05	0.000570766	3.24354
TcIL3000.A.H_000215300.1	hypothetical protein, conserved		-2.19952	5.68355	3.64347	0.000466004	0.00719815	2.14278
TcIL3000.A.H_000738400.1	WD40 repeat protein	Protein-protein interaction	-1.72955	5.68347	2.93951	0.00301151	0.0314067	1.50298
TcIL3000.A.H_000555400.1	oxidoreductase, putative	mitochondrial electron transport chain	1.89054	5.68281	-3.3101	0.00114859	0.0146591	1.83389
TcIL3000.A.H_000969100.1	Basal body protein, putative (HP)	flagellum / motility	1.96345	5.67779	-3.25689	0.00132267	0.0162814	1.78831
TcIL3000.A.H_000354600.1	dynein heavy chain, putative	flagellum / motility	3.24194	5.6751	-7.92782	2.20531e-09	7.64981e-07	6.11635
TcIL3000.A.H_000915800.1	Mnd1 family, putative	meiosis	-2.87104	5.67363	6.45682	1.38373e-07	1.51042e-05	4.8209
TcIL3000.A.H_000190900.1	cysteine peptidase, Clan CA, family C1, Cathepsin L-like		2.10076	5.669	-4.64012	2.75756e-05	0.000806258	3.09353
TcIL3000.A.H_000338400.1	dolicholphosphate-mannose synthase, putative (HP)	Protein glycosylation	2.21424	5.65806	-3.72847	0.000368619	0.00603385	2.21941
TcIL3000.A.H_000783900.1	hypothetical protein, conserved, pseudogene		-2.99624	5.65558	7.16187	1.85139e-08	3.49771e-06	5.45622	Adenylate cyclase
TcIL3000.A.H_000280400.1	protein kinase, putative	signalling	1.98976	5.6448	-3.84776	0.000264582	0.00462501	2.33489
TcIL3000.A.H_000369200.1	antigenic protein, putative (HP)	Surface	1.90234	5.64249	-2.82749	0.00399199	0.0392913	1.4057
TcIL3000.A.H_000259200.1	cystathione gamma lyase, putative	Protein synthesis (cysteine metabolism)	-2.2459	5.63923	4.46141	4.62349e-05	0.00118904	2.9248
TcIL3000.A.H_000658600.1	leucine-rich repeat protein (LRRP), putative		2.67236	5.62853	-6.65909	7.73582e-08	9.99957e-06	5.00002
TcIL3000.A.H_000491000.1	Invariant surface glycoprotein, putative	Surface	-1.90413	5.62642	3.40852	0.00088277	0.0117489	1.93
TcIL3000.A.H_000601400.1	class I transcription factor A, subunit 5a	Gene expression regulation	1.87073	5.62593	-3.72686	0.000370271	0.00603385	2.21941
TcIL3000.A.H_000192100.1	Transferrin Receptor	Surface	2.52144	5.62572	-6.4896	1.25901e-07	1.4382e-05	4.84218
TcIL3000.A.H_000557800.1	cysteine peptidase, Clan CD, family C50, putative		2.23909	5.62475	-5.09384	7.35168e-06	0.000300929	3.52154
TcIL3000.A.H_000906000.1	Mitochondrial ribosomal protein L52, kinetoplast ribosomal PPR-repeat containing protein 13 , putative (HP)	ribosomal	2.3214	5.61706	-3.99267	0.000176187	0.00335438	2.47439
TcIL3000.A.H_000518300.1	farnesyl pyrophosphate synthase	isoprenoid biosynthesis, sterol metabolism	1.82869	5.61524	-2.99264	0.00263037	0.0277858	1.55618
TcIL3000.A.H_000918700.1	conserved protein - pseudogene		1.73272	5.61339	-2.7535	0.00479608	0.0456557	1.34051
TcIL3000.A.H_000385100.1	hypothetical protein, conserved		1.99536	5.61105	-4.13087	0.000119147	0.00252264	2.59815
TcIL3000.A.H_000988900.1	PH domain containing protein, putative		2.01897	5.6099	-4.11519	0.000124571	0.00260381	2.58439
TcIL3000.A.H_000526400.1	Fam79, hypothetical protein, conserved	Surface	1.86331	5.60813	-2.89061	0.00340777	0.0345065	1.4621
TcIL3000.A.H_000932200.1	GPI-anchored surface protein, putative (HP)	Surface	2.00223	5.60166	-3.67808	0.000423659	0.00671295	2.17309
TcIL3000.A.H_000829400.1	kinesin, putative	flagellum / motility	2.26905	5.59362	-5.16081	6.04412e-06	0.000267466	3.57273
TcIL3000.A.H_000916300.1	multipass transmembrane protein, putative (HP)		-1.88564	5.59359	2.71521	0.00526915	0.0494877	1.3055
TcIL3000.A.H_000872300.1	DNA repair protein, putative	DNA repair	3.4574	5.58711	-7.20721	1.62938e-08	3.39597e-06	5.46904
TcIL3000.A.H_000597600.1	JAB1/Mov34/MPN/PAD-1 ubiquitin protease, putative	Protein breakdown (metallopeptidase)	2.34308	5.5865	-4.88534	1.35143e-05	0.000451581	3.34526
TcIL3000.A.H_000842500.1	synaptotagmin, putative	Vesicle & trafficking	-2.38254	5.58512	4.92223	1.21358e-05	0.000427496	3.36907
TcIL3000.A.H_000781900.1	hypothetical protein, conserved, pseudogene		-1.68095	5.57559	2.86953	0.00359334	0.035948	1.44433	Adenylate cyclase
TcIL3000.A.H_000917100.1	hypothetical protein, conserved		-1.79231	5.57555	3.24443	0.00136696	0.0166613	1.77829
TcIL3000.A.H_000306000.1	hypothetical protein, conserved - pseudogene		2.03998	5.55986	-4.12517	0.000121091	0.00255279	2.59299	Adenylate cyclase
TcIL3000.A.H_000384700.1	protein phosphatase 2C, putative	regulation	2.54155	5.55827	-4.9788	1.02888e-05	0.000379989	3.42023
TcIL3000.A.H_000550000.1	EF-hand domain pair, putative	Gene expression regulation	2.59872	5.5566	-6.01182	5.02425e-07	3.73926e-05	4.42721
TcIL3000.A.H_000549600.1	hypothetical protein, conserved - pseudogene		2.77294	5.55096	-6.23746	2.60876e-07	2.28825e-05	4.6405	Adenylate cyclase
TcIL3000.A.H_000728900.1	protein kinase, putative	signalling	3.7247	5.53517	-8.05976	1.53915e-09	6.17297e-07	6.20951
TcIL3000.A.H_000606700.1	Zn-finger in Ran binding protein and others, putative		2.0251	5.51217	-4.03822	0.000154926	0.00301917	2.52011
TcIL3000.A.H_000904700.1	long-chain-fatty-acid-CoA ligase, putative	lipid metabolism	2.26228	5.51069	-5.23547	4.85795e-06	0.000225116	3.64759
TcIL3000.A.H_000482400.1	Dynein heavy chain region D6 P-loop domain containing protein, putative (HP)	Protein synthesis	-2.35139	5.50908	5.04536	8.47084e-06	0.00033287	3.47773
TcIL3000.A.H_000279800.1	hypothetical protein, conserved, pseudogene		-2.11612	5.49772	4.55216	3.55759e-05	0.000992892	3.0031	Adenylate cyclase
TcIL3000.A.H_000695100.1	cystathione gamma lyase, putative	Protein synthesis (cysteine metabolism)	-1.85579	5.49761	3.69105	0.000408774	0.00656176	2.18298
TcIL3000.A.H_000723400.1	aspartyl-tRNA synthetase, putative	Protein synthesis	1.79456	5.49553	-3.26187	0.00130538	0.016151	1.7918
TcIL3000.A.H_000119200.1	VSG, putative	Surface	1.82399	5.48937	-2.9362	0.00303694	0.0316047	1.50025
TcIL3000.A.H_000552400.1	Got1/Sft2-like family, putative	vesicle & trafficking	-2.30868	5.4885	5.47892	2.38223e-06	0.000125823	3.90024
TcIL3000.A.H_000018400.1	hypothetical protein, conserved - pseudogene		1.95236	5.48226	-3.10474	0.00197057	0.0219987	1.6576	Adenylate cyclase
TcIL3000.A.H_000510500.1	NADH-cytochrome b5 reductase, putative	mitochondrial electron transport chain	-2.319	5.48138	4.50011	4.13508e-05	0.00108618	2.9641
TcIL3000.A.H_000625900.1	hypothetical protein, conserved, pseudogene		-3.25582	5.47867	5.86589	7.68674e-07	5.25043e-05	4.27981	Adenylate cyclase
TcIL3000.A.H_000384400.1	serine threonine-protein phosphatase PP1, putative	signalling	2.18429	5.4757	-4.53573	3.73064e-05	0.00102223	2.99045
TcIL3000.A.H_000648400.1	electon transport protein SCO1/SCO2, putative	mitochondrial electron transport chain	-1.96929	5.47145	2.90475	0.00328847	0.033652	1.47299
TcIL3000.A.H_000758900.1	Protein of unknown function (DUF3592), putative		1.87559	5.46833	-2.73302	0.00504397	0.0477379	1.32114
TcIL3000.A.H_000897400.1	nucleobase/nucleoside transporter 8.1, putative	DNA synthesis	-2.06208	5.44805	4.16715	0.000107465	0.00231521	2.63541
TcIL3000.A.H_000621200.1	transketolase, putative	nucleotide synthesis	-1.87428	5.44465	3.48847	0.000711421	0.0100417	1.99819
TcIL3000.A.H_000652400.1	monothiol glutaredoxin, putative	DNA synthesis	1.96276	5.43217	-3.05756	0.00222643	0.0242489	1.61531
TcIL3000.A.H_000977500.1	kinetoplast ribosomal PPR-repeat containing protein 14, putative	ribosome	2.15273	5.42245	-3.5053	0.00067967	0.00967692	2.01426
TcIL3000.A.H_000820200.1	conserved protein		1.87711	5.41109	-2.77625	0.00453398	0.0434979	1.36153
TcIL3000.A.H_001009700.1	phosphatidylinositol 3-related kinase, putative	phospholipid metabolism	-1.92716	5.41015	2.92519	0.0031228	0.0324295	1.48906
TcIL3000.A.H_000914500.1	emp24/gp25L/p24 family/GOLD, putative	vesicle & trafficking	-2.59059	5.40781	5.4429	2.64708e-06	0.000135442	3.86825
TcIL3000.A.H_000890200.1	glycerolphosphate mutase, putative	Energy production	-1.96505	5.39855	3.15914	0.00171028	0.0197668	1.70406
TcIL3000.A.H_000690000.1	Cullin family, putative	PTM in ubiquitination processes	1.99844	5.39094	-3.43955	0.000812018	0.0110488	1.95668
TcIL3000.A.H_000187300.1	VSG, putative - Phy15	Surface	2.86133	5.3906	-6.3887	1.68426e-07	1.68838e-05	4.77253
TcIL3000.A.H_001003500.1	J-binding protein	DNA binding	2.47508	5.38422	-4.15516	0.000111197	0.00238515	2.62248
TcIL3000.A.H_000469300.1	hypothetical protein, conserved		2.05443	5.38113	-3.6154	0.00050333	0.00767813	2.11474
TcIL3000.A.H_000402500.1	hypothetical protein, conserved		-2.26959	5.37493	4.04877	0.000150371	0.00297429	2.52662
TcIL3000.A.H_000684300.1	Zinc-binding domain containing protein, putative		-2.19219	5.37233	3.87109	0.000247877	0.00445997	2.35067
TcIL3000.A.H_000842600.1	60S ribosomal protein L7, putative	ribosome	-2.53552	5.36308	5.6271	1.54415e-06	8.61917e-05	4.06453
TcIL3000.A.H_000016400.1	hypothetical protein, conserved		-1.9485	5.33623	4.14431	0.00011468	0.00244918	2.61098
TcIL3000.A.H_000286400.1	Eukaryotic protein of unknown function (DUF866), putative		2.5748	5.33364	-5.67172	1.35529e-06	7.83201e-05	4.10613
TcIL3000.A.H_000490800.1	Thioesterase-like superfamily, putative	thiol metabolism	2.7538	5.3207	-5.36614	3.31395e-06	0.00016117	3.79272
TcIL3000.A.H_000883400.1	carnitine O-acetyltransferase, putative	lipid metabolism	-2.1097	5.31924	4.00821	0.000168629	0.00322298	2.49174
TcIL3000.A.H_000349200.1	NOL1/NOP2/sun family, putative	SAMe metabolism	2.31758	5.31917	-4.47157	4.48998e-05	0.00116078	2.93525
TcIL3000.A.H_000897500.1	nucleobase/nucleoside transporter 8.1, putative	DNA synthesis	-2.01093	5.30567	3.8179	0.00028756	0.00496287	2.30427
TcIL3000.A.H_000536000.1	SpoU rRNA Methylase family, putative	ribosome	2.87255	5.28915	-6.50739	1.19615e-07	1.39893e-05	4.8542
TcIL3000.A.H_000622900.1	CYC2-like cyclin, putative	gene expression regulation (post-transcriptional)	-2.27052	5.28552	4.33303	6.68891e-05	0.00162628	2.78881
TcIL3000.A.H_000442700.1	hypothetical protein, conserved - pseudogene		2.33511	5.26749	-3.91633	0.000218376	0.00401746	2.39605	Adenylate cyclase
TcIL3000.A.H_000184600.1	trans-sialidase	Surface decoration - sialylation	-2.01761	5.25633	3.95718	0.000194702	0.00366427	2.43601
TcIL3000.A.H_000795500.1	hypothetical protein, conserved		2.85985	5.25332	-6.80676	5.0706e-08	6.91855e-06	5.15999
TcIL3000.A.H_000733300.1	ubiquitin carboxyl-terminal hydrolase, putative	protein degradation	-2.00076	5.22787	3.85961	0.000255968	0.00456768	2.3403
TcIL3000.A.H_000840600.1	phosphatidic acid phosphatase, putative	phospholipid metabolism	3.55715	5.2121	-8.03783	1.63373e-09	6.17297e-07	6.20951
TcIL3000.A.H_000558500.1	amidohydrolase, putative	amide metabolism	2.45728	5.19653	-5.24883	4.67175e-06	0.00022065	3.6563
TcIL3000.A.H_000233800.1	phosphatidic acid phosphatase	phospholipid metabolism	3.4584	5.18019	-7.19106	1.70521e-08	3.39597e-06	5.46904
TcIL3000.A.H_000144200.1	hypothetical protein, conserved		-2.12519	5.17333	4.37902	5.86123e-05	0.00144892	2.83896
TcIL3000.A.H_000911000.1	hypothetical protein, conserved, pseudogene		-2.07145	5.14037	3.02355	0.00243009	0.0259999	1.58503	Adenylate cyclase
TcIL3000.A.H_000187200.1	hypothetical protein, conserved		-2.17941	5.13748	4.75009	2.00372e-05	0.00061132	3.21373
TcIL3000.A.H_000928800.1	serine/threonine protein kinase, putative	signalling	-1.92354	5.13706	2.74536	0.00489312	0.0463996	1.33349
TcIL3000.A.H_000648300.1	hypothetical protein, conserved		-2.42273	5.13608	4.54234	3.66009e-05	0.00101002	2.99567
TcIL3000.A.H_000396700.1	hypothetical protein, conserved in T. brucei and T. congolense		-2.11349	5.12092	4.48983	4.25962e-05	0.00111294	2.95353
TcIL3000.A.H_000897300.1	nucleobase/nucleoside transporter 8.1, putative	DNA synthesis	-2.1522	5.09962	4.7047	2.28626e-05	0.000680613	3.1671
TcIL3000.A.H_000426600.1	hypothetical protein, conserved		3.21724	5.05509	-5.25093	4.64311e-06	0.00022065	3.6563
TcIL3000.A.H_000383200.1	Amastin surface glycoprotein, putative	Surface	-2.68105	4.92197	5.18369	5.65266e-06	0.000252417	3.59788
TcIL3000.A.H_000429400.1	hypothetical protein, conserved		2.44877	4.90882	-3.28155	0.00123908	0.0156061	1.80671
TcIL3000.A.H_000320300.1	Elongation factor P (EF-P) KOW-like domain containing protein, putative	Protein synthesis	-2.13691	4.80784	3.12514	0.00186883	0.0211513	1.67466
TcIL3000.A.H_000171200.1	VSG, putative - Phy8	Surface	-2.1414	4.80701	3.91944	0.000216477	0.00399751	2.39821
TcIL3000.A.H_000890300.1	membrane-associated protein, putative (HP)	Surface	-2.62976	4.50989	5.08184	7.6141e-06	0.000309095	3.50991
